# Supplementary material for: Carbon Nanotube-Mediated Plasmid DNA Delivery in Rice Leaves and Seeds
Source: MDPI journal article supplement (doi:10.3390/ijms23084081), 2022-04-07
Supplement: s1 [file s1]

## Supplementary Materials

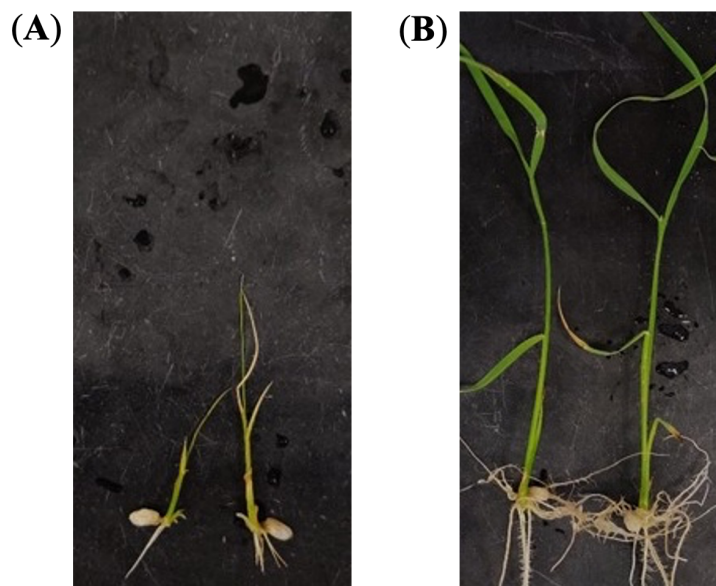

**Supplementary Figure S1.** Subset of rice seeds that were imbibed in pDNA-CNT solution at a 2:1 CRISPR/Cas vectors to CNT ratio. Seeds were grown on sterile MS0 media plates for up to two weeks. Experimental seeds (A) that showed altered growth compared to (B) healthy, wild type seeds, were used for subsequent sequencing experiments.

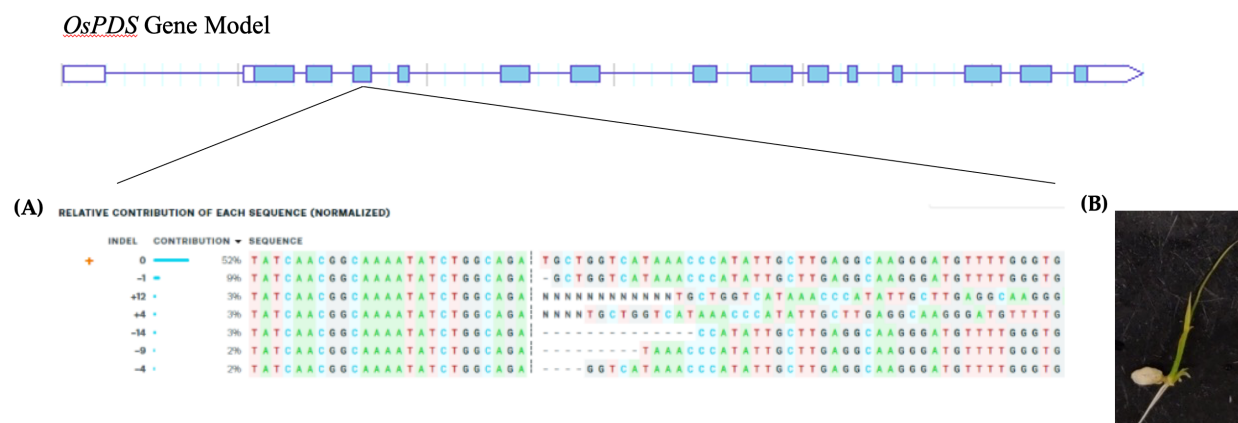

**Supplementary Figure S2.** Syntheso ICE analysis tool was run on individual trace files returned from Sanger sequencing of potential mutant rice seedlings. (A) Sequences present in the edited population and their relative proportions. Expected cut sites three bp upstream the PAM are represented by black vertical dotted lines, and the wild type sequence is marked by the orange “+” symbol. (B) Example of a phenotypically aberrant seed sent for Sanger sequencing. *OsPDS* gene model from MSU Rice Genome Annotation database.

**sgRNA2, 1 bp insertion**  
**R1 - 1,205 reads, frequency: 0.08% (1/1205)**  
 AGGATTAGCTGGTTTATCAACGGCAAAATATCTGGCAGATGCTGGTCATAAACCCATATTGCTTGAGGCAAGG , 1162  
 AGGATTAGCTGGTTTATCAACGGCAAAAATATCTGGCAGATGCTGGTTCATAAACCCATATTGCTTGAGGCAAGG , 1

**R2 - 1,218 reads, frequency: 0.08% (1/1218)**  
 CAATATGGGTTTATGACCAGCATCTGCCAGATATTTTGCCGTTGATAAACCCAGCTAATCCTGAAAAAAAAAATC , 1187  
 CAATATGGGTTTATGACCAGCATCTGCCAGATATTTTGGCGTTGATAAACCCAGCTAATCCTGAAAAAAAAAATC , 1

**sgRNA2, 1 bp deletion**  
**R1 - 1,317 reads, frequency: 0.2% (3/1317)**  
 AGGATTAGCTGGTTTATCAACGGCAAAATATCTGGCAGATGCTGGTCATAAACCCATATTGCTTGAGGCAAGG , 1249  
 AGGATTAGCTGGTTTATCAACGGCAAAATCTCTGGCAGATGCTGGTCATAAACCCATATTGCTTGAGGCAAGG , 3  
 AGGATTAGCTGGTTTATCAACGGCAAA-TATCTGGCAGATGCTGGTCATAAACCCATATTGCTTGAGGCAAGG , 3

**R2 - 1,258 reads, frequency: 0.2% (3/1258)**  
 CAATATGGGTTTATGACCAGCATCTGCCAGATATTTTGCCGTTGATAAACCCAGCTAATCCTGAAAAAAAAAATC , 1250  
 CAATATGGGTTTATGACCCGCATCTGCCAGATATTTTGGCGTTGATAAACCCAGCTAATCCTGAAAAAAAAAATC , 3  
 CAATATGGGTTTATGACCAGCATCTGCCAGATA-TTTGCCGTTGATAAACCCAGCTAATCCTGAAAAAAAAAATC , 3

**sgRNA2, 1 bp deletion**  
**R2 - 1,409 reads, frequency: 0.1% (3/2513)**  
 CAATATGGGTTTATGACCAGCATCTGCCAGATATTTTGCCGTTGATAAACCCAGCTAATCCTGAAAAAAAAAATC , 2482  
 CAATATGGGTTTATGACCAGCATCTACCAGATATTTTGGCGTTGATAAACCCAGCTAATCCTGAAAAAAAAAATC , 4  
 CAATATGGGTTTATGACCAGCATCTGCCAGATATTTTACCGTTGATAAACCCAGCTAATCCTGAAAAAAAAAATC , 4  
 CAATATGGGTTTATGACCAGCATCCGCCAGATATTTTGGCGTTGATAAACCCAGCTAATCCTGAAAAAAAAAATC , 3  
 CAATATGGGTTTATGACCAGCATCTGCCAGATA-TTTGCCGTTGATAAACCCAGCTAATCCTGAAAAAAAAAATC , 3

**Supplementary Figure S3.** Sequence analysis of the target amplicon results for the sgRNA-2 region, with the PAM underlined and the PAM plus wild type gRNA sequence highlighted in yellow. All the detected mutations were either heterozygous or chimeric. Insertions and deletions were detected at frequencies ranging from 0.08% to 0.2% (MiSeq read counts are shown in right column). Several base substitutions in the target sgRNA-2 region are also shown.

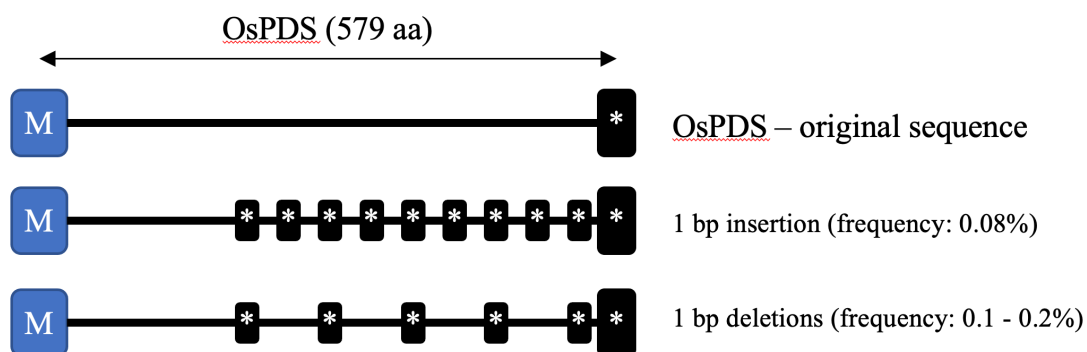

**Supplementary Figure S4.** Graphical representation of the stop codon peptides created in the OsPDS protein as a consequence of the 1 bp insertion or 1 bp deletions in the target region of sgRNA-2. All cases indicate the development of pre-mature stop codons leading to truncated proteins that would be expected to knock out the function of OsPDS. M: methionine amino acid, \*: stop/termination codon.

**Supplementary Table S1.** Summary of the *OsPDS* samples analyzed through target amplicon analysis.

|                     | Template for target amplicon analysis |             |              | Target amplicon analysis - sgRNA1 |               |                |               | Target amplicon analysis - sgRNA2 |               |                |               |
|---------------------|---------------------------------------|-------------|--------------|-----------------------------------|---------------|----------------|---------------|-----------------------------------|---------------|----------------|---------------|
|                     | Total samples analyzed                | Genomic DNA | PCR amplicon | Insertion (R1)                    | Deletion (R1) | Insertion (R2) | Deletion (R2) | Insertion (R1)                    | Deletion (R1) | Insertion (R2) | Deletion (R2) |
| <b>Seeds</b>        | 59                                    | 37          | 22           | 0                                 | 3             | 0              | 0             | 0                                 | 4             | 0              | 12            |
| <b>SAMs</b>         | 18                                    | 18          | 0            | 0                                 | 1             | 0              | 0             | 0                                 | 0             | 0              | 0             |
| <b>Pooled seeds</b> | 28                                    | 28          | 0            | 0                                 | 2             | 0              | 0             | 1                                 | 0             | 1              | 8             |
| <b>Total</b>        | <b>105</b>                            | <b>83</b>   | <b>22</b>    | <b>0</b>                          | <b>6</b>      | <b>0</b>       | <b>0</b>      | <b>1</b>                          | <b>4</b>      | <b>1</b>       | <b>20</b>     |

**Note:** Samples for target sequence analysis were prepared using as template genomic DNA or previously isolated PCR product. Pair-end target amplicon analysis (1 million read pairs (Read Length-250x250)) was performed with a MiSeq and the resulted fastq files were analyzed by CRIS.py. Detection of indels for the respective strands (R1 or R2) of the target sgRNA regions is depicted.

**Supplementary Table S2.** Primers used for PCR amplification.

| Target                                | Lab Code | Sequence (5' to 3')                      |
|---------------------------------------|----------|------------------------------------------|
| GFP transcripts (F)                   | NT068    | TGAGGGATACGTGCAGGAG                      |
| GFP transcripts (R)                   | NT069    | TGCCGTTCTTTTGCTTGTCG                     |
| YFP transcripts (R)                   | NT076    | AAGAAGATGGTGCGTCCTG                      |
| YFP transcripts (F)                   | NT077    | ACGTAAACGGCCACAAGTTC                     |
| Elongation Factor 1- $\alpha$ (F)     | NT122    | TCATCATGAACCACCCTGGC                     |
| Elongation Factor 1- $\alpha$ (R)     | NT123    | TGGGCTTGGTGGAATCATC                      |
| GUSPlus plasmid (F)                   | NT035    | TCCGACCTGATGCAGCTCTC                     |
| GUSPlus plasmid (R)                   | NT036    | GATTCCTTGCGGTCCGAATG                     |
| GUSPlus transcripts (F)               | NT039    | GCACCATCAAGACGTTCTCC                     |
| GUSPlus transcripts (R)               | NT040    | CTTCTGTGGGTCGAGTTCCT                     |
| <i>OsPDS</i> genomic sequence (F)     | NT005    | GCTTCGCAAGTAGCAGCATC                     |
| <i>OsPDS</i> genomic sequence (R)     | NT008    | GGTGCAAGCAATGTTTCAGG                     |
| GUSPlus cassette amplification (F)    | NT057    | AAGCTTCACCTGCTCATCCGGTGAGACTTTCAACAAAGGG |
| GUSPlus cassette amplification (R)    | NT058    | GGATCCACCTGCCCACTGATCTAGTAACATAGATGACAC  |
| tRNA-sgRNA targeting <i>OsPDS</i> (F) | NT062    | AAGCTTCGTCTCTTGGAACAAAGCACCAGTGGTCTAG    |
| tRNA-sgRNA targeting <i>OsPDS</i> (R) | NT063    | GGATCCCGTCTCTAAACGCATCTGCCAG             |
